# Supplementary material
Source: Royal Society of Chemistry journal article supplement (doi:10.1039/d6qm00189k)
Supplement: d6qm00189k5.pdf [file d6qm00189k5.pdf]

## Highly conductive, biocompatible and stretchable sputtered Pt electrode via island-bridge effect

F. Javier Patiño, Lidia Sánchez-Beato, Alicia Jiménez, Mario Durán-Prado, J. L. Polo, Ismael Payo, J.P. Andrés, M. Antonia Herrero, Ester Vázquez.

### SUPPORTING INFORMATION

#### XPS analysis

Figure S1 shows XPS data for O1S peak.

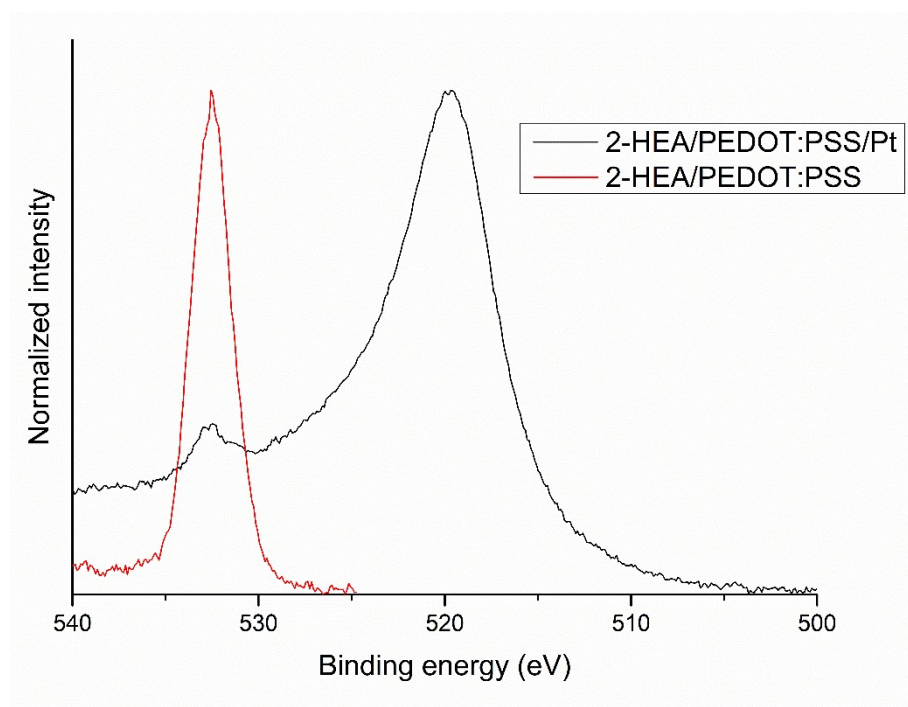

**Figure S 1:** XPS comparison of the O1S peak between 2-HEA/PEDOT:PSS/Pt electrode and 2-HEA/PEDOT:PSS support.

Figure S2 shows the deconvolution of XPS data for Pt 4f peak

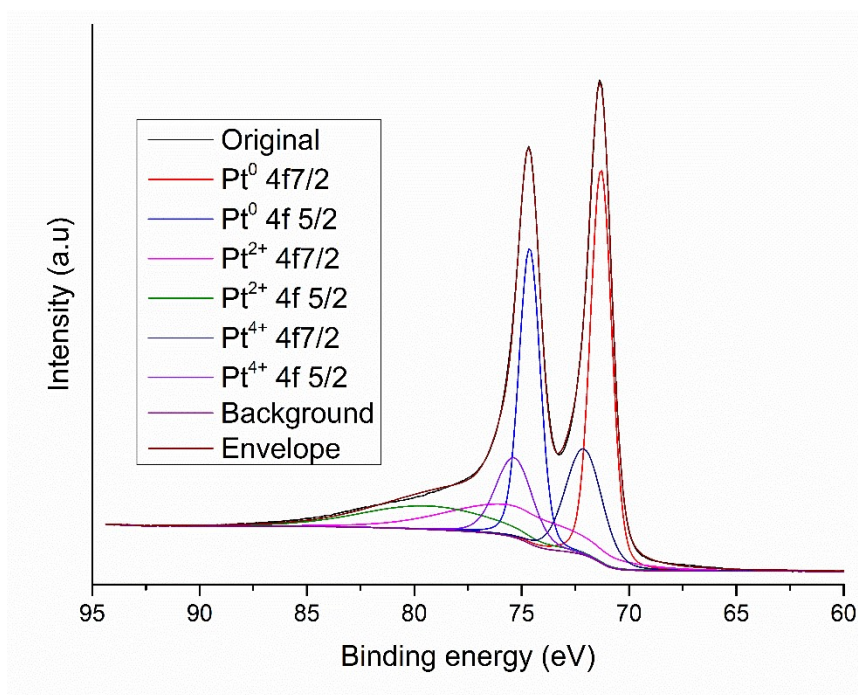

Figure S 2: Deconvolution of the Pt4f peak from XPS data

### XRD analysis

XRD data is shown in Figure S3:

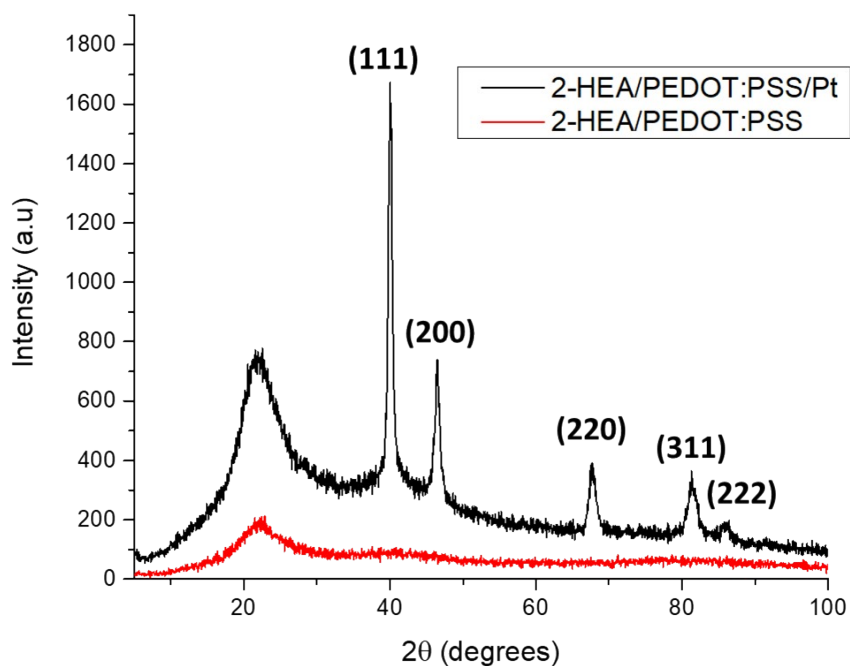

Figure S 3: XRD comparison of 2-HEA/PEDOT:PSS/Pt electrode and 2-HEA/PEDOT:PSS support

### FTIR analysis

FTIR data is shown in Figure S4:

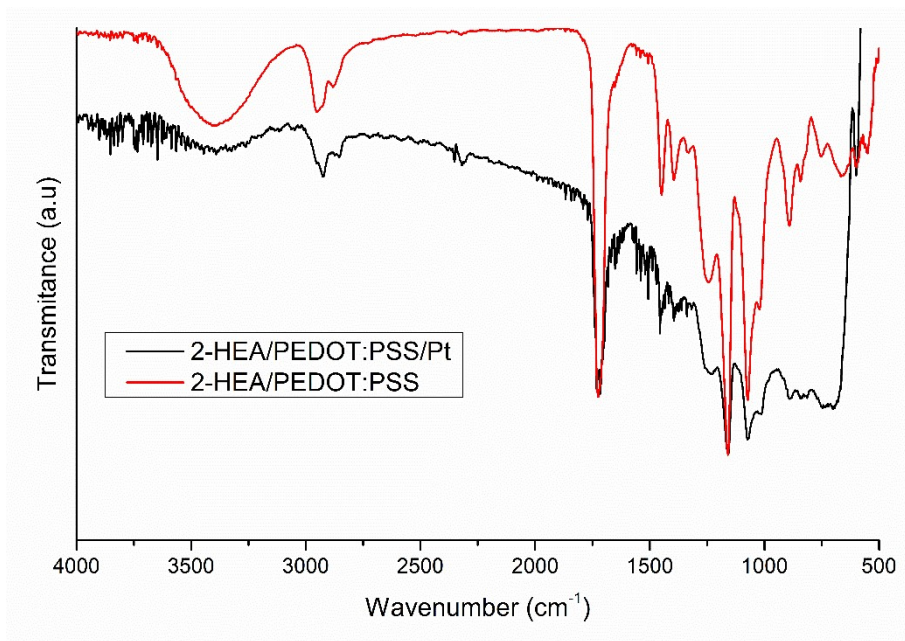

**Figure S 4:** FTIR comparison of 2-HEA/PEDOT:PSS/Pt electrode and 2-HEA/PEDOT:PSS support

### Tensile cycles

Tensile cycles data is shown in Figure S5:

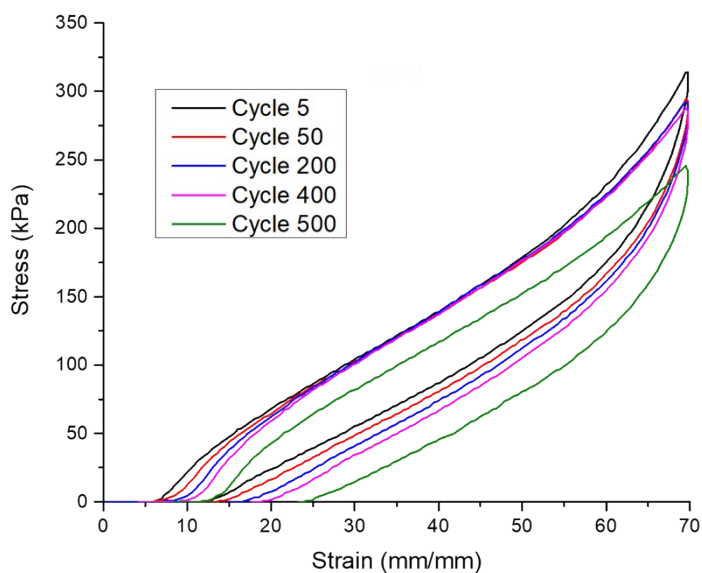

**Figure S 5:** Tensile stress–strain behavior of the 2-HEA/PEDOT:PSS/Pt electrode over multiple loading–unloading cycles.
